# Supplementary material for: Evolution of the structural and electronic properties of beryllium-doped aluminum clusters: comparison with neutral and cationic aluminum clusters
Source: Royal Society of Chemistry journal article supplement (doi:10.1039/c2cp42386c), 2012-01-01
Supplement: c2cp42386c.pdf [file c2cp42386c.pdf]

Electronic Supplementary Information (ESI) available for:

**Evolution of the structural and electronic properties of beryllium-doped aluminum clusters: comparison with neutral and cationic aluminum clusters**

Wei-Ming Sun, Ying Li, Di Wu<sup>\*</sup>, Zhi-Ru Li

Institute of Theoretical Chemistry, State Key Laboratory of Theoretical and Computational Chemistry, Jilin University, Changchun 130023, People's Republic of China. Tel: +86-431-81707218; E-mail: wud@mail.jlu.edu.cn

**Table S1.** Binding energy per atom ( $E_b$ , in eV), the second difference in energy ( $\Delta^2E$ , in eV), and the dissociation energy ( $\Delta E$ , in eV) of the most stable  $Al_nBe$  ( $n = 1-13$ ) clusters.

| clusters            | $E_b$   |       | $\Delta E$ |        | $\Delta^2E$ |        |
|---------------------|---------|-------|------------|--------|-------------|--------|
|                     | CCSD(T) | B3LYP | CCSD(T)    | B3LYP  | CCSD(T)     | B3LYP  |
| AlBe                | 0.141   | 0.308 | -0.281     | -0.616 |             |        |
| Al <sub>2</sub> Be  | 0.622   | 0.822 | -1.584     | -1.849 | -0.424      | -0.333 |
| Al <sub>3</sub> Be  | 0.968   | 1.162 | -2.008     | -2.182 | -0.017      | -0.036 |
| Al <sub>4</sub> Be  | 1.179   | 1.373 | -2.024     | -2.217 | 0.178       | 0.163  |
| Al <sub>5</sub> Be  | 1.290   | 1.486 | -1.846     | -2.054 | -1.581      | -1.396 |
| Al <sub>6</sub> Be  | 1.596   | 1.767 | -3.427     | -3.450 | 2.093       | 1.975  |
| Al <sub>7</sub> Be  | 1.563   | 1.731 | -1.334     | -1.476 | -0.822      | -0.662 |
| Al <sub>8</sub> Be  | 1.629   | 1.776 | -2.156     | -2.138 | -0.038      | -0.168 |
| Al <sub>9</sub> Be  | 1.685   | 1.829 | -2.194     | -2.306 | 0.012       | -0.053 |
| Al <sub>10</sub> Be | 1.731   | 1.877 | -2.182     | -2.359 | -0.414      | -0.096 |
| Al <sub>11</sub> Be | 1.803   | 1.925 | -2.595     | -2.454 | -0.667      | -0.757 |
| Al <sub>12</sub> Be | 1.915   | 2.024 | -3.263     | -3.211 | 0.498       | 0.563  |
| Al <sub>13</sub> Be | 1.976   | 2.069 | -2.765     | -2.648 |             |        |

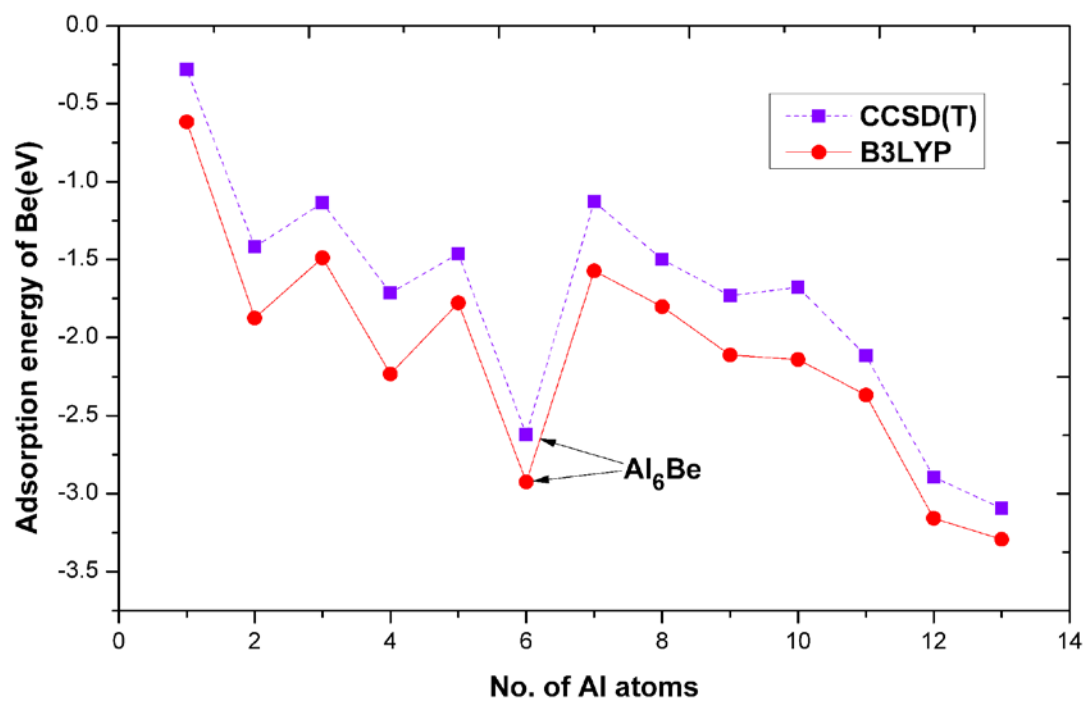

**Figure S1.** The adsorption energies of Be ( $E_{ad}$ ) (in eV) for the lowest-energy structures of  $Al_n Be$  clusters with  $1 \leq n \leq 13$  at the CCSD(T)/aug-cc-pVDZ (dashed line) and B3LYP/aug-cc-pVDZ (solid line) levels, shown as a function of the number of Al atoms.

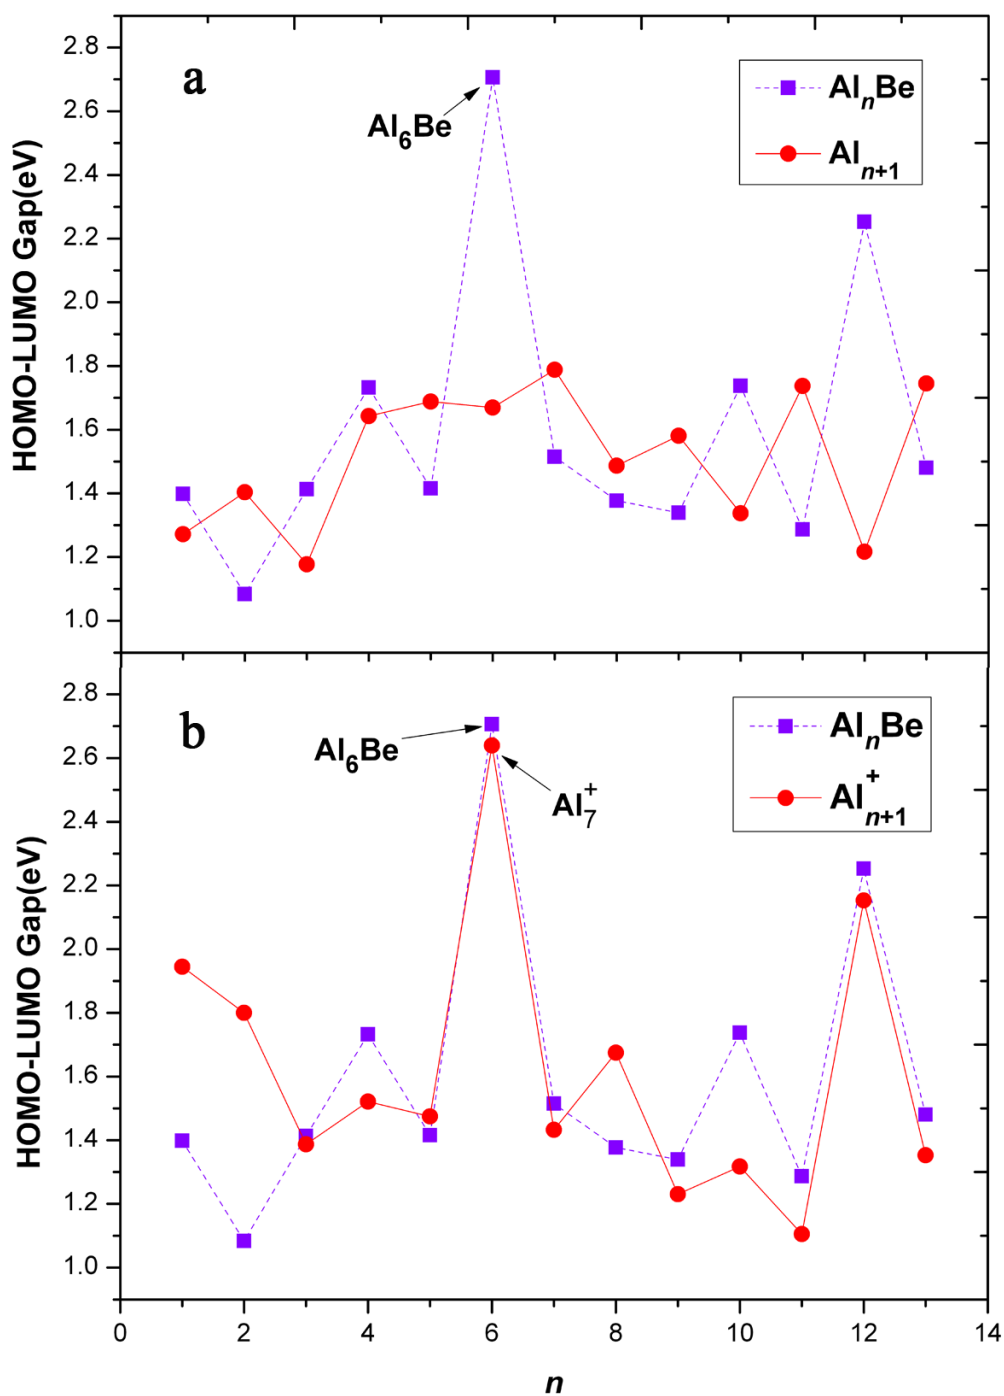

**Figure S2.** The HOMO–LUMO energy gaps (in eV) for the lowest-energy structures of  $Al_nBe$  (dashed line) and (a)  $Al_{n+1}$  clusters (solid line) and (b)  $Al_{n+1}^+$  cluster cations (solid line) at the B3LYP/aug-cc-pVDZ level, shown as a function of  $n$ .

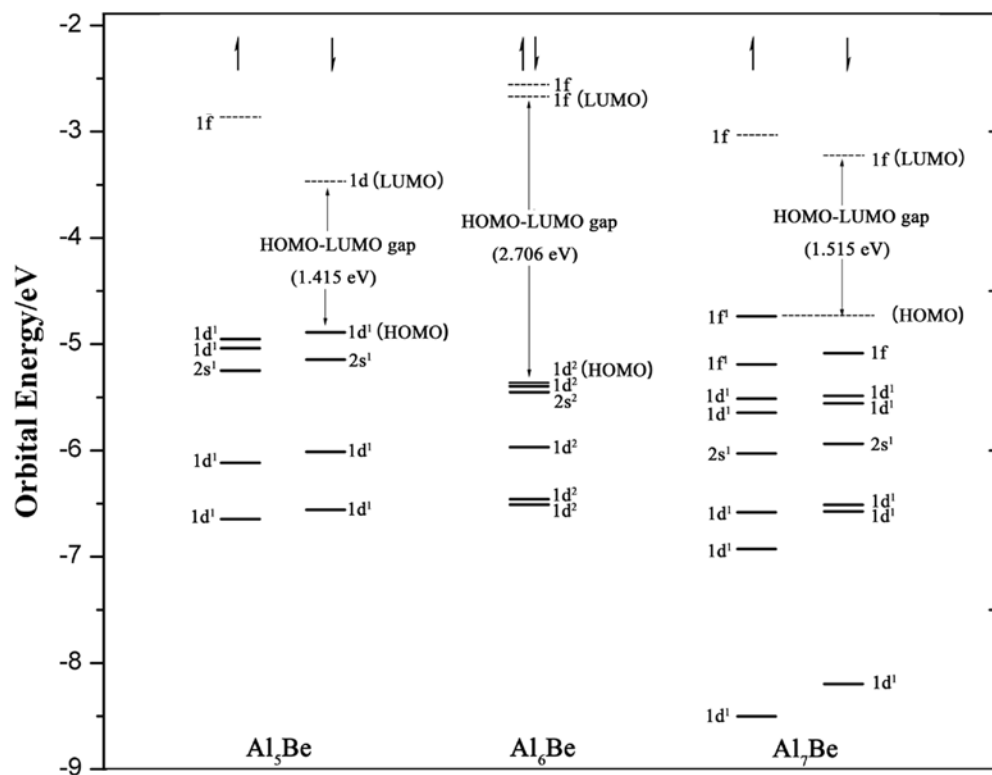

**Figure S3.** Orbital energies of valence 1d, 2s, and partial 1f orbitals of the  $\text{Al}_5\text{Be}$ ,  $\text{Al}_6\text{Be}$ , and  $\text{Al}_7\text{Be}$  clusters. Occupied states are indicated by solid lines, and unoccupied ones by dotted lines.

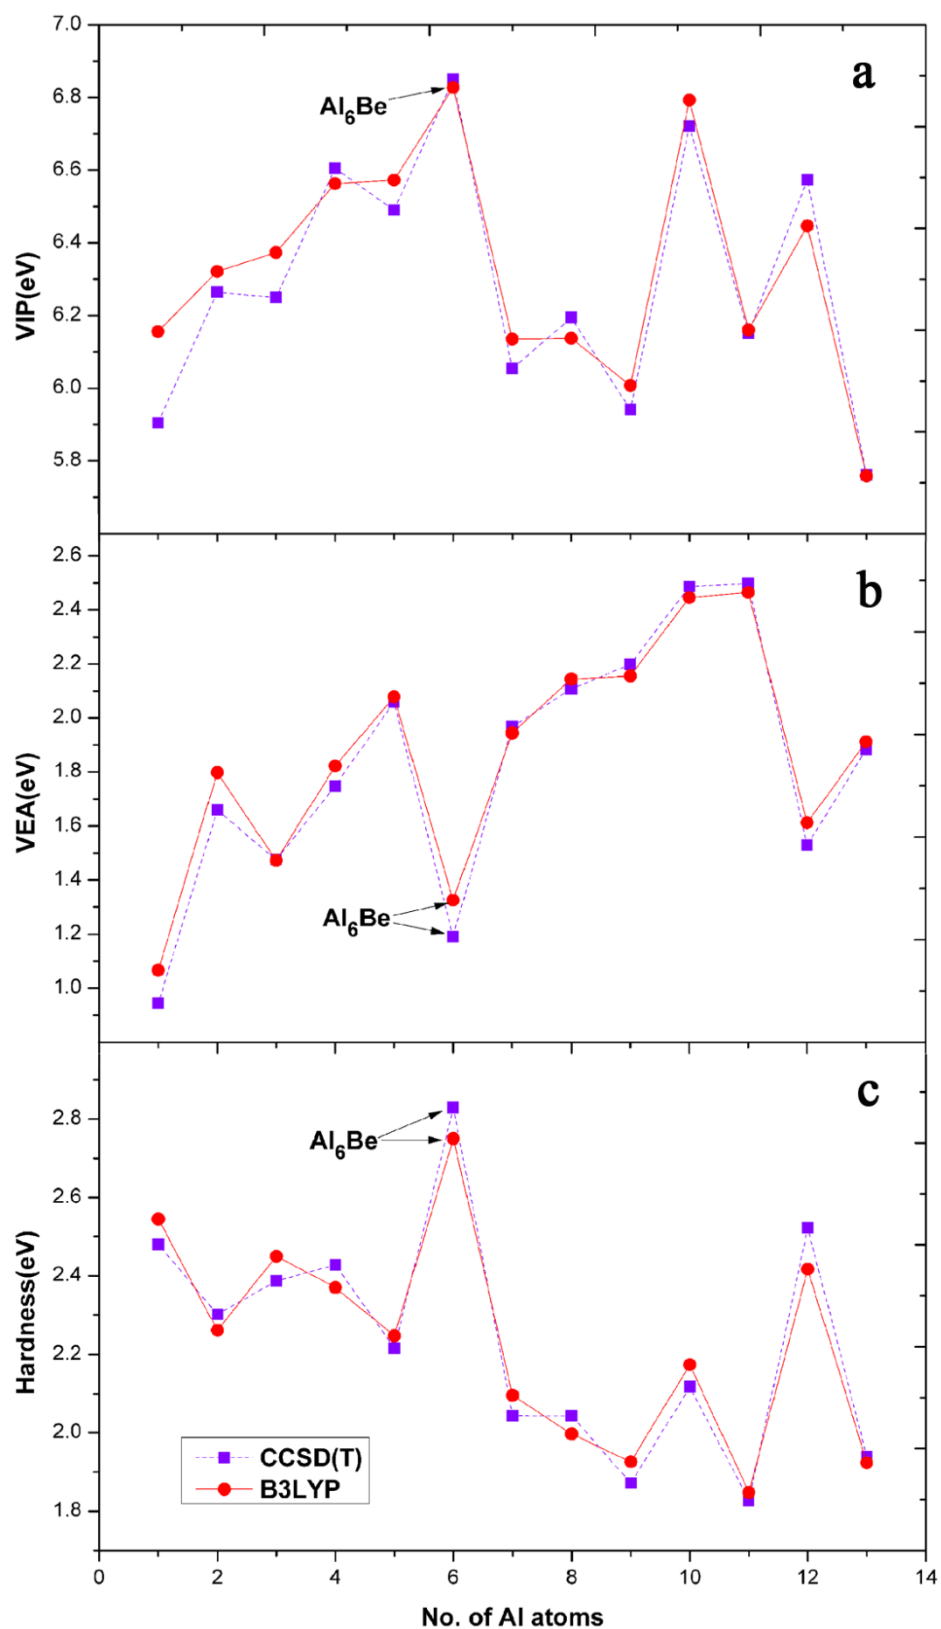

**Figure S4.** The (a) vertical ionization potentials (VIPs), (b) vertical electron affinities (VEA), (c) hardnesses ( $\eta$ , in eV) for the lowest-energy structures of Al<sub>n</sub>Be clusters with  $1 \leq n \leq 13$  at the CCSD(T)/aug-cc-pVDZ (dashed line) and B3LYP/aug-cc-pVDZ (solid line) levels, shown as a function of the number of Al atoms.

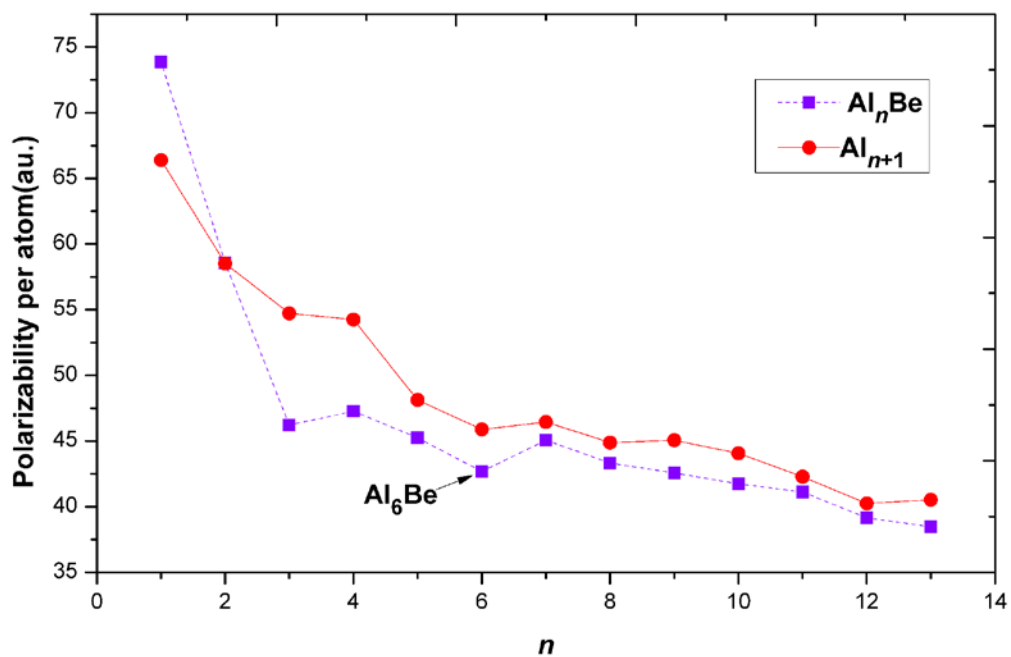

**Figure S5.** Polarizabilities per atom (in au.) for the lowest-energy structures of  $\text{Al}_n\text{Be}$  (dashed line) and  $\text{Al}_{n+1}$  clusters (solid line) at the B3LYP/aug-cc-pVDZ level, shown as a function of  $n$ .
